# Supplementary material for: Water structure in solution and crystal molecular dynamics simulations compared to protein crystal structures
Source: Royal Society of Chemistry journal article supplement (doi:10.1039/c9ra09601a), 2020-01-01

*Supplementary Information*

**Water structure  
in solution and crystal molecular dynamics simulations  
compared to protein crystal structures**

**Octav Caldararu,<sup>1</sup> Majda Misini Ignjatović,<sup>1</sup> Esko Oksanen<sup>2</sup> and  
Ulf Ryde <sup>\*1</sup>**

<sup>1</sup> Department of Theoretical Chemistry, Lund University, Chemical Centre, P. O. Box 124,  
SE-221 00 Lund, Sweden

<sup>2</sup> Instruments Division, European Spallation Source Consortium ESS ERIC,  
P. O. Box 176, SE-221 00 Lund, Sweden

Correspondence to Ulf Ryde, E-mail: [Ulf.Ryde@teokem.lu.se](mailto:Ulf.Ryde@teokem.lu.se),

Tel: +46 – 46 2224502, Fax: +46 – 46 2228648

2020-02-14

**Table S1.** Average residence time (ps) of water molecules in the crystallographic water sites of R- and S-galactin-3C in the four simulations. Residence times were calculated by counting the number of continuous frames in which a certain water molecule is within 2.5 Å of the crystallographic water sites in the MD simulations. The residence time is averaged over all crystallographic water sites and over all ten simulations.

| <b>Simulation</b> | <b>Residence time</b> |
|-------------------|-----------------------|
| Crystal R         | 84                    |
| Solution R        | 55                    |
| Crystal S         | 82                    |
| Solution S        | 52                    |

**Table S2.** Recall of crystallographic water molecules in the 100 ns crystal or solution MD simulations of R- and S-galactin-3C against the 100 K (cryo) crystal structure from the grid-based global clustering. The number of crystallographic waters that have at least one MD water cluster within 1.0, 1.5, 2.0, 2.5 or 3.0 Å is given and the percentage of the total number of crystallographic waters is given in parentheses.

| <b>MD</b>            | <b>1.0</b> | <b>1.5</b> | <b>2.0</b> | <b>2.5</b> | <b>3.0</b> |
|----------------------|------------|------------|------------|------------|------------|
| <b>R-galactin-3C</b> |            |            |            |            |            |
| Crystal              | 38 (18%)   | 114 (54%)  | 177 (84%)  | 190 (90%)  | 205 (97%)  |
| Solution             | 36 (17%)   | 91 (43%)   | 168 (80%)  | 191 (91%)  | 200 (95%)  |
| <b>S-galactin-3C</b> |            |            |            |            |            |
| Crystal              | 62 (29%)   | 112 (53%)  | 149 (71%)  | 192 (91%)  | 195 (93%)  |
| Solution             | 56 (27%)   | 117 (55%)  | 157 (74%)  | 187 (89%)  | 200 (95%)  |

**Table S3.** Recall of crystallographic water molecules in the 100 ns MD simulations of R- and S-galactin-3C (in the crystal or in solution) against the 100 K crystal structure from the non-grid-based global clustering. The number of crystallographic waters that have at least one MD water cluster within 1.0, 1.5, 2.0, 2.5 or 3.0 Å is given and the percentage of the total number of crystallographic waters is given in parentheses.

| <b>MD</b>            | <b>1.0</b> | <b>1.5</b> | <b>2.0</b> | <b>2.5</b> | <b>3.0</b> |
|----------------------|------------|------------|------------|------------|------------|
| <b>R-galactin-3C</b> |            |            |            |            |            |
| Crystal              | 53 (25%)   | 123 (58%)  | 156 (74%)  | 177 (84%)  | 197 (93%)  |
| Solution             | 45 (21%)   | 118 (56%)  | 160 (76%)  | 177 (84%)  | 190 (90%)  |
| <b>S-galactin-3C</b> |            |            |            |            |            |
| Crystal              | 57 (27%)   | 113 (53%)  | 146 (68%)  | 187 (87%)  | 205 (96%)  |
| Solution             | 49 (23%)   | 111 (52%)  | 150 (70%)  | 190 (89%)  | 200 (93%)  |

**Figure S1.** Box volume in the 1 ns NPT equilibration of the crystal MD simulation of R-galectin-3C.

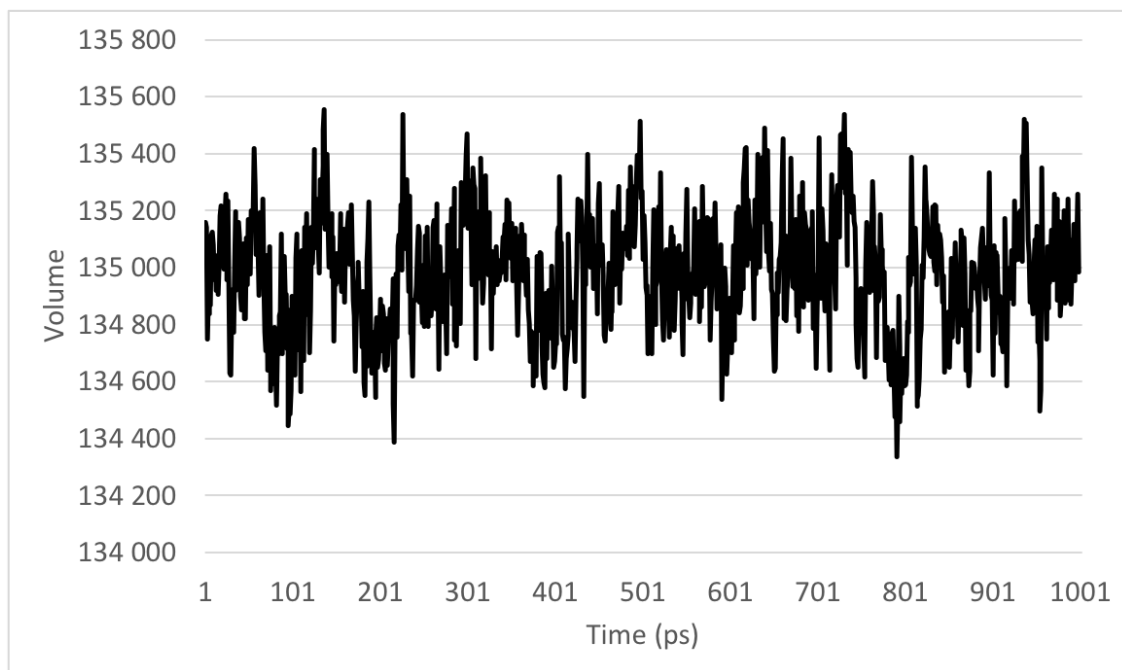

**Figure S2.** Protein heavy-atom RMSD in the  $10 \times 10$  ns simulations and in the 100 ns simulations.

(a) Crystal MD simulation of R-galectin-3C

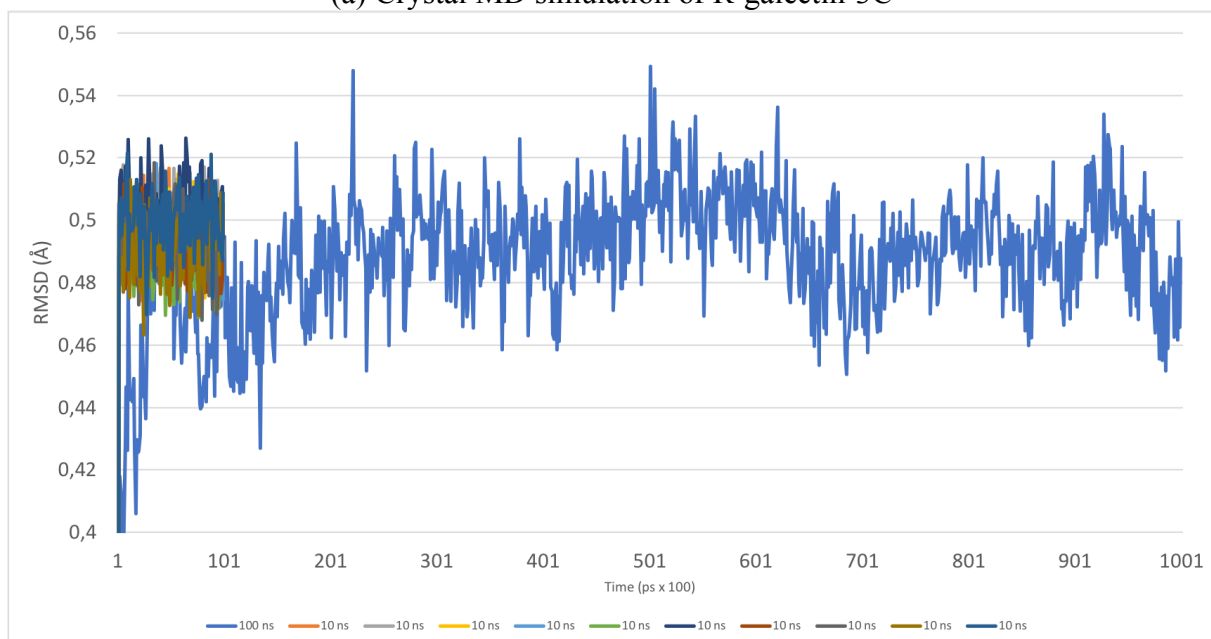

(b) Solution MD simulation of R-galectin-3C

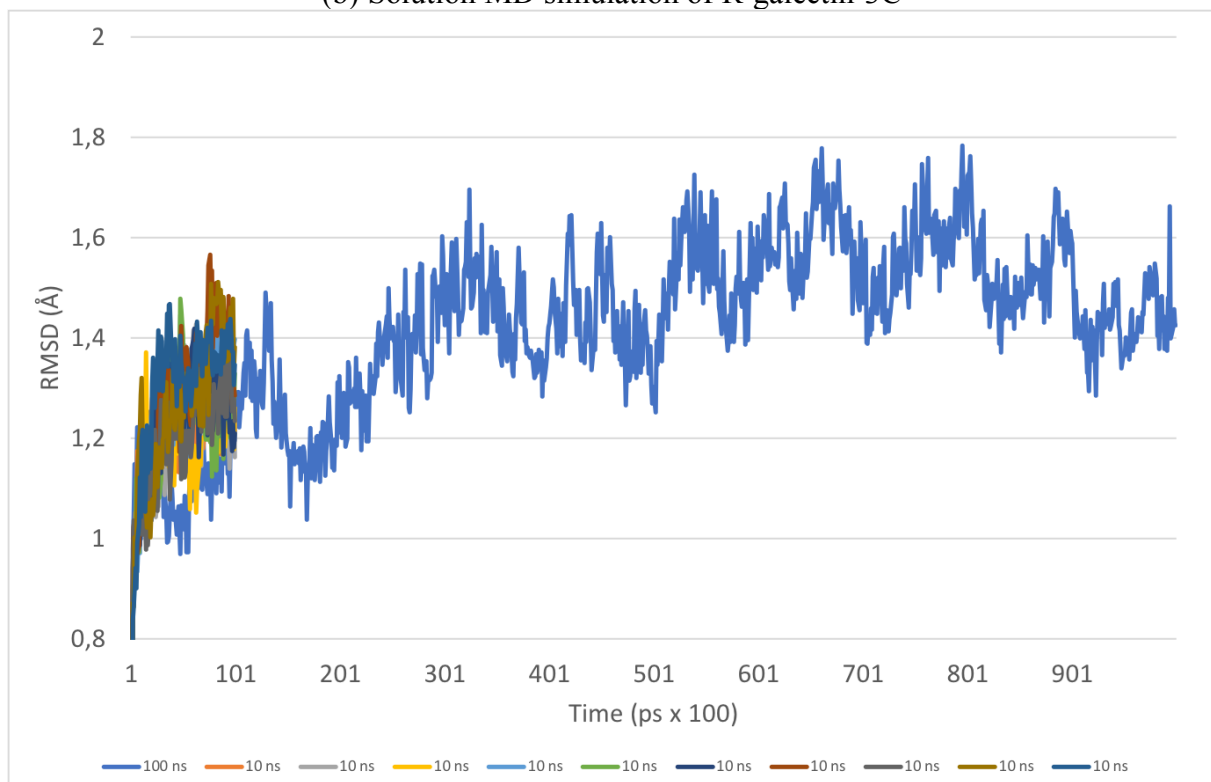

(c) Crystal MD simulation of S-galectin-3C

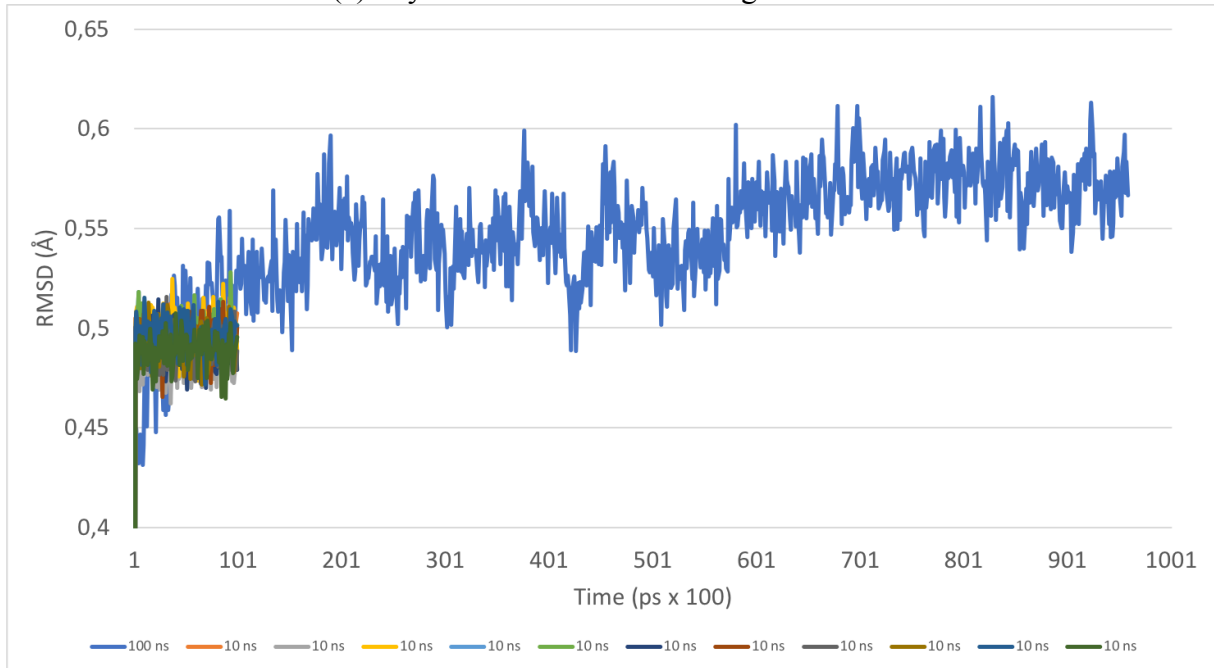

(d) Solution MD simulation of S-galectin-3C

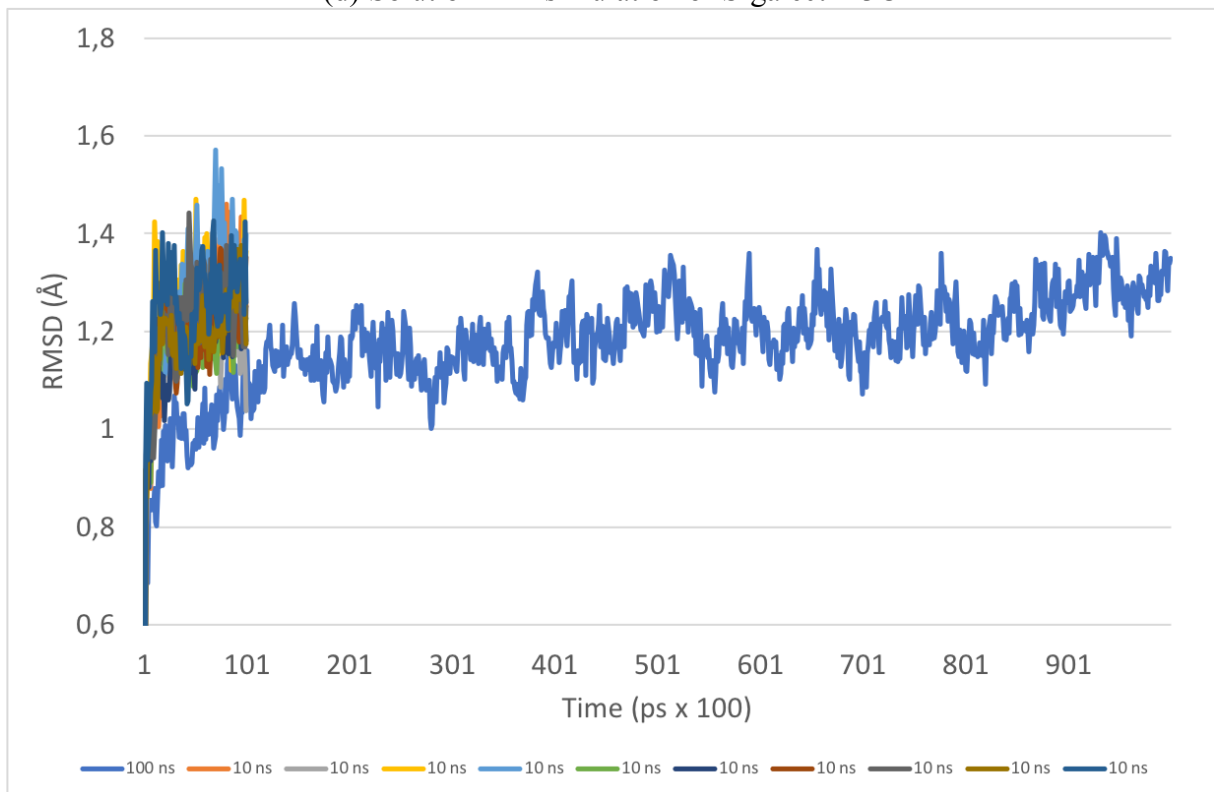

**Figure S3.** Dependence of the (a) recall and (b) prediction statistics on the density threshold. The statistics were computed using a distance cutoff distance of 1.5 Å and using only the crystallographic water molecules in the cryo-temperature structure.

(a) recall statistics

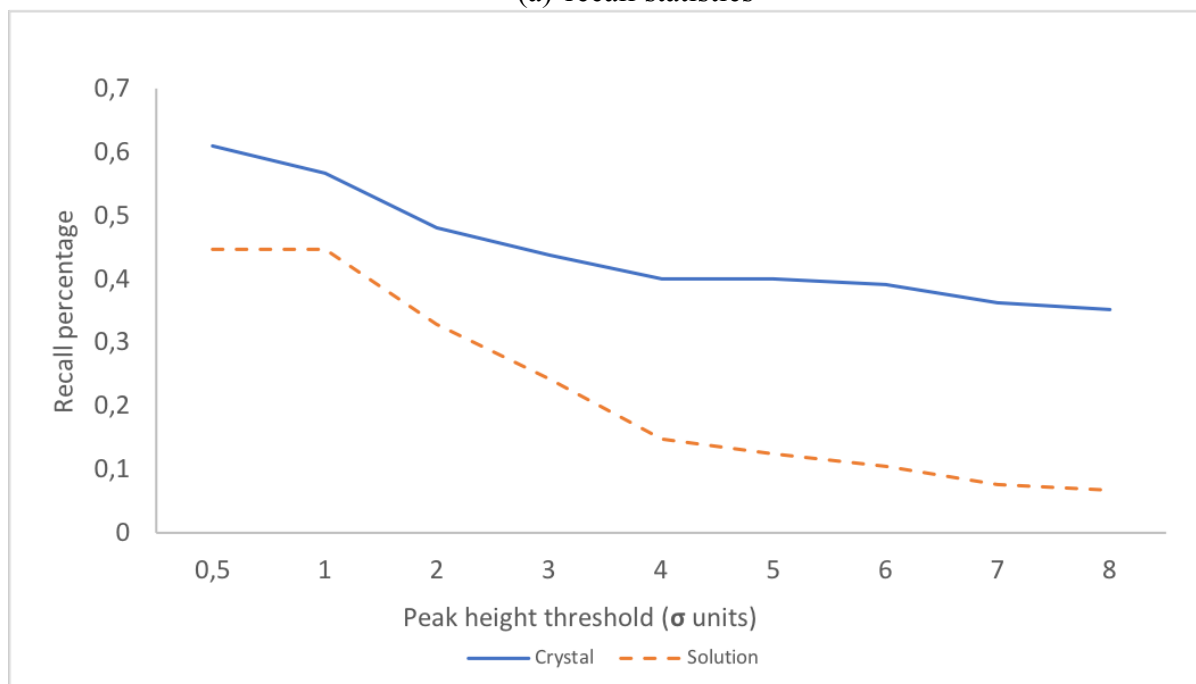

(b) prediction statistics

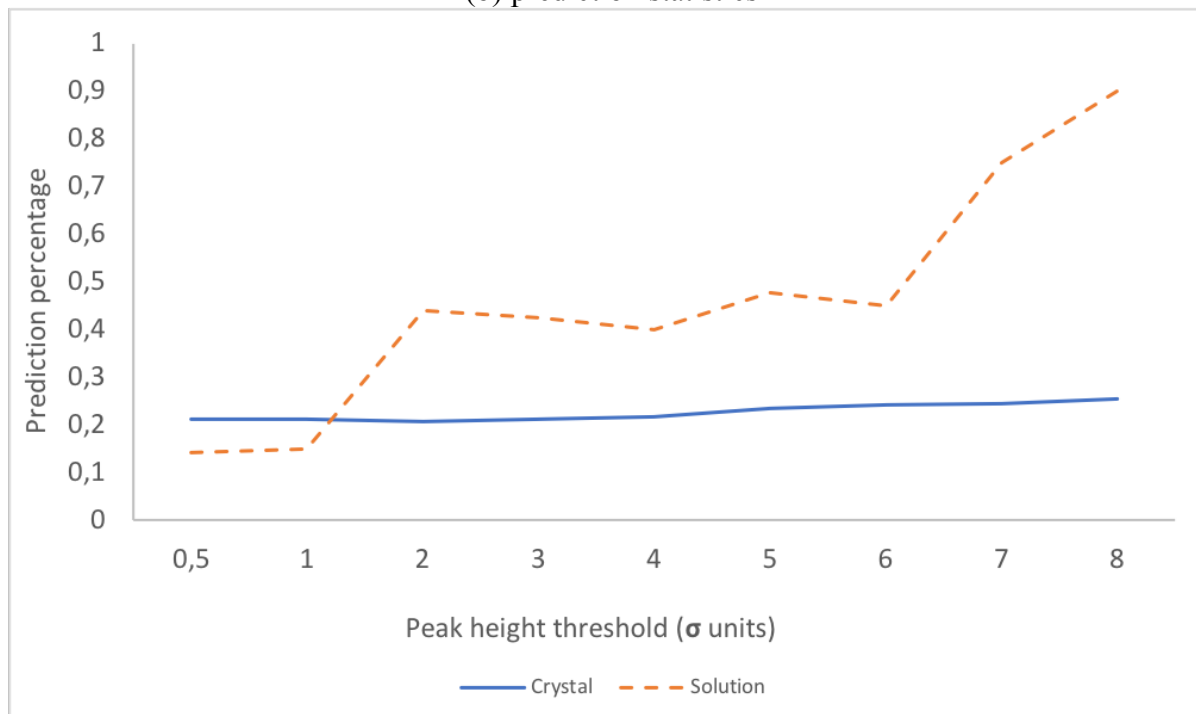

Supplement: c9ra09601a1.pdf [file c9ra09601a1.pdf]
